# Supplementary material for: Classification Model for Epileptic Seizure Using Simple Postictal Laboratory Indices
Source: MDPI journal article supplement (doi:10.3390/jcm12124031), 2023-06-13
Supplement: s1 [file s1]

# **Classification Model for Epileptic Seizure Using Simple Postictal Laboratory Indices**

**Sun Jin Jin <sup>1</sup>, Taesic Lee <sup>2,3</sup>, Hyun Eui Moon <sup>3</sup>, Eun Seok Park <sup>1</sup>, Sue Hyun Lee <sup>1</sup>, Young Il Roh <sup>4</sup>, Dong Min Seo <sup>5</sup>, Won-Joo Kim <sup>6</sup> and Heewon Hwang <sup>1,\*</sup>**

<sup>1</sup> Department of Neurology, Wonju Severance Christian Hospital, Yonsei University Wonju College of Medicine, Wonju 26426, Republic of Korea

<sup>2</sup> Division of Data Mining and Computational Biology, Institute of Global Health Care and Development, Wonju 26426, Republic of Korea

<sup>3</sup> Department of Family Medicine, Yonsei University Wonju College of Medicine, Wonju 26426, Republic of Korea

<sup>4</sup> Department of Emergency Medicine, Yonsei University Wonju College of Medicine, Wonju 26426, Republic of Korea

<sup>5</sup> Department of Medical Information, Yonsei University Wonju College of Medicine, Wonju 26426, Republic of Korea

<sup>6</sup> Department of Neurology, Gangnam Severance Christian Hospital, Yonsei University College of Medicine, Seoul 06273, Republic of Korea

\* Correspondence: nmdrhee@yonsei.ac.kr; Tel.: +82-33-741-2376; Fax: +82-33-741-0520

**Table S1.** References in the literature-based search for variables.

| Variables                           | Journal                                                                                                                                                                                 | Author               | Year of publication |
|-------------------------------------|-----------------------------------------------------------------------------------------------------------------------------------------------------------------------------------------|----------------------|---------------------|
| Age                                 | Epilepsy in older people                                                                                                                                                                | Sen et al.           | 2020                |
| Sex                                 | Sex differences in seizure types and symptoms                                                                                                                                           | Carison et al.       | 2014                |
| Cerebrovascular disease             | Epilepsy in cerebrovascular diseases: Review of experimental and clinical data with meta-analysis of risk factors                                                                       | Ferlazzo et al.      | 2016                |
| Neurodegenerative disease           | Dementia and adult-onset unprovoked seizures                                                                                                                                            | Hesdorffer et al.    | 1996                |
| Hypertension                        | Hypertension and the risk of new-onset unprovoked seizures.                                                                                                                             | Ng et al.            | 1993                |
| Diabetes mellitus                   | Association Between Seizures and Diabetes Mellitus: A Comprehensive Review of Literature                                                                                                | Yun et al.           | 2013                |
| Dyslipidemia                        | A high risk of hyperlipidemia in epilepsy patients: a nationwide population-based cohort study                                                                                          | Harnod et al.        | 2014                |
| Cardiovascular disease              | Association Between Midlife Risk Factors and Late-Onset Epilepsy Results From the Atherosclerosis Risk in Communities Study                                                             | Johnson et al.       | 2018                |
| Cardiac arrhythmia                  | Cardiac arrhythmias during or after epileptic seizures                                                                                                                                  | van der Lende et al. | 2016                |
| Liver disease                       | Risk of seizures and status epilepticus in older patients with liver diseases                                                                                                           | Alkhachroum et al.   | 2018                |
| Renal disease                       | Subclinical seizure activity and prophylactic phenytoin infusion in acute liver failure: a controlled clinical.                                                                         | Ellis et al.         | 2000                |
| Thyroid disease                     | Thyroid hormones: Possible roles in epilepsy pathology                                                                                                                                  | Tamijani et al.      | 2015                |
| Erythrocyte sedimentation rate      | Predictors of early seizure recurrence in patients admitted for seizures in the emergency department                                                                                    | Choquet et al.       | 2008                |
| White blood cell                    | Peripheral WBC count and serum prolactin level in various seizure types and nonepileptic events                                                                                         | Shah et al.          | 2001                |
| Red blood cell                      | A study on the relationship between CBC and EEG for epilepsy patients                                                                                                                   | Jo et al.            | 2015                |
| Hemoglobin                          | A study on the relationship between CBC and EEG for epilepsy patients                                                                                                                   | Jo et al.            | 2015                |
| Hematocrit                          | A study on the relationship between CBC and EEG for epilepsy patients                                                                                                                   | Jo et al.            | 2015                |
| Platelet                            | A study on the relationship between CBC and EEG for epilepsy patients                                                                                                                   | Jo et al.            | 2015                |
| Delta neutrophil index              | Delta neutrophil index: in search of an early indicator of sepsis                                                                                                                       | Peneva et al.        | 2021                |
| Myeloperoxidase index               | Evaluation of usefulness of myeloperoxidase index (MPXI) for differential diagnosis of systemic inflammatory response syndrome (SIRS) in the emergency department                       | Cha et al.           | 2014                |
| Creatinine kinase                   | Serum creatine phosphokinase is helpful in distinguishing generalized tonic-clonic seizures from psychogenic nonepileptic seizures and vasovagal syncope                                | Petramfar et al.     | 2009                |
| Creatinine kinase-myoglobin binding | Elevated CK-MB mass and plasma brain-type natriuretic peptide concentrations following convulsive seizures in children and adolescents: Possible evidence of subtle cardiac dysfunction | Alehan et al.        | 2009                |
| Cardiac troponin I                  | Cardiac involvement in patients with acute neurologic disease: confirmation with cardiac troponin I.                                                                                    | Dixit et al.         | 2000                |
| Brain-type natriuretic peptide      | cTnI, BNP and CRP profiling after seizures in patients with drug-resistant epilepsy                                                                                                     | Faria et al.         | 2020                |
| Ammonia                             | Postictal transient hyperammonemia as an indicator of seizure disorder.                                                                                                                 | Liu et al.           | 2010                |
| Prolactin                           | Predictivity of Plasma Prolactin Levels in Differentiating Epilepsy from Pseudoseizures: A Prospective Study                                                                            | Anzola et al.        | 1993                |
| Lactate                             | Lactate as a diagnostic marker in transient loss of consciousness                                                                                                                       | Matz et al.          | 2016                |
| Myoglobin                           | Impairment of renal function after generalised seizures                                                                                                                                 | Nielsen et al.       | 1987                |
| Neuron specific enolase             | Serum neuron-specific enolase level as a biomarker in differential diagnosis of seizure and syncope                                                                                     | Lee et al.           | 2010                |
| Protein S100-B                      | Clinical significance of serological biomarkers and neuropsychological performances in patients with temporal lobe epilepsy                                                             | Chang et al.         | 2012                |

**Table S2.** Sensitivity, specificity, positive predictive value, and negative predictive value for Feature 3, Feature 4, and Feature 5 (final seizure classification model).

|                                                           | <b>Sensitivity</b> | <b>Specificity</b> | <b>Positive<br/>predictive<br/>value</b> | <b>Negative<br/>predictive<br/>value</b> |
|-----------------------------------------------------------|--------------------|--------------------|------------------------------------------|------------------------------------------|
| <b>Feature 3</b>                                          | 0.700              | 0.733              | 0.832                                    | 0.564                                    |
| <b>Feature 4</b>                                          | 0.729              | 0.756              | 0.849                                    | 0.596                                    |
| <b>Feature 5<br/>(Final seizure classification model)</b> | 0.771              | 0.811              | 0.885                                    | 0.652                                    |
